# Supplementary material for: A Self-Powered Triboelectric Nanogenerator Based on Intelligent Interactive System for Police Shooting Training Monitoring and Virtual Reality Interaction
Source: MDPI journal article supplement (doi:10.3390/ma15186228), 2022-09-08
Supplement: s1 [file s1]

# **A Self-Powered Triboelectric Nanogenerator Based on Intelligent Interactive System for Police Shooting Training Monitoring and Virtual Reality Interaction**

**Songyang Li <sup>1</sup>, Changjun Jia <sup>2</sup>, Fengxin Sun <sup>2</sup> and Yongsheng Zhu <sup>2,\*</sup>**

<sup>1</sup> Police Skills and Tactics Training Department, Criminal Investigation Police University of China, Shenyang 110035, China

<sup>2</sup> Physical Education Department, Northeastern University, Shenyang 110819, China

\* Correspondence: 2001276@stu.neu.edu.cn

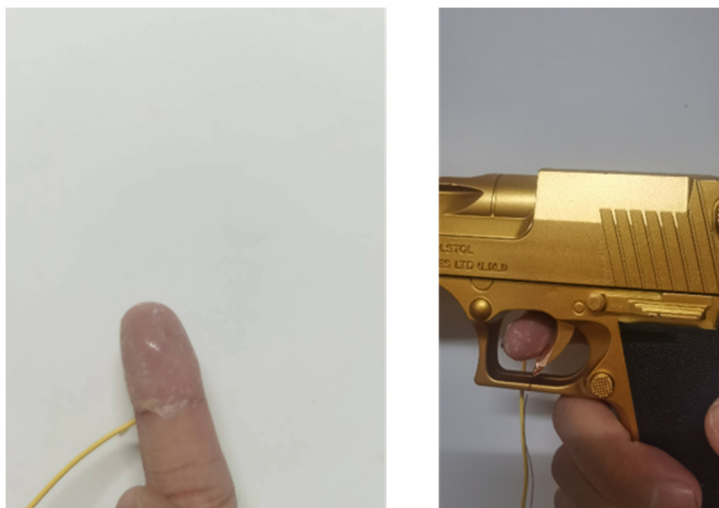

**Figure S1.** The latex attaches to the finger and PTFE on the trigger.

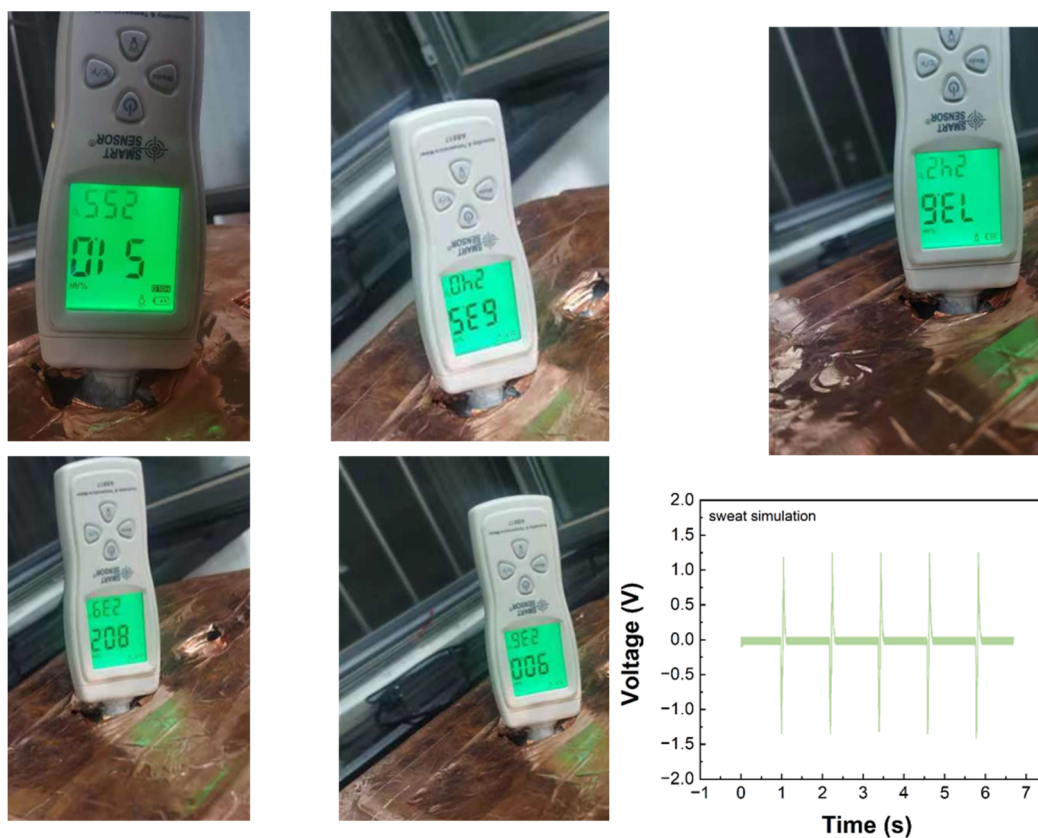

**Figure S2.** Different relative humidity test and voltage of sweat simulation.

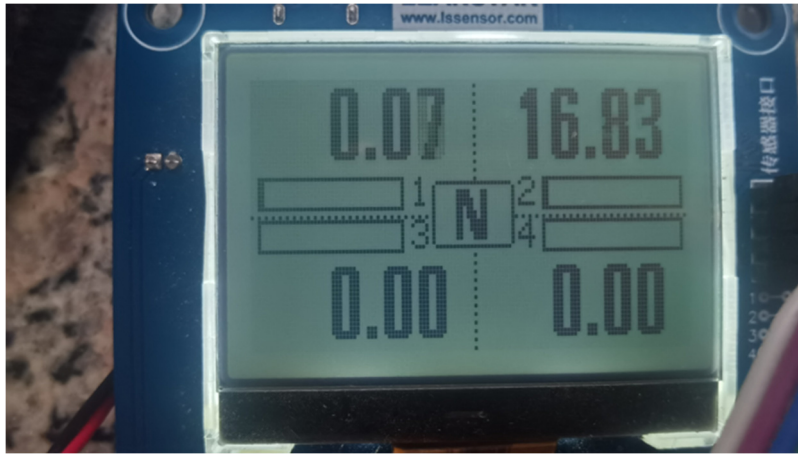

**Figure S3.** The applied force of durability test.

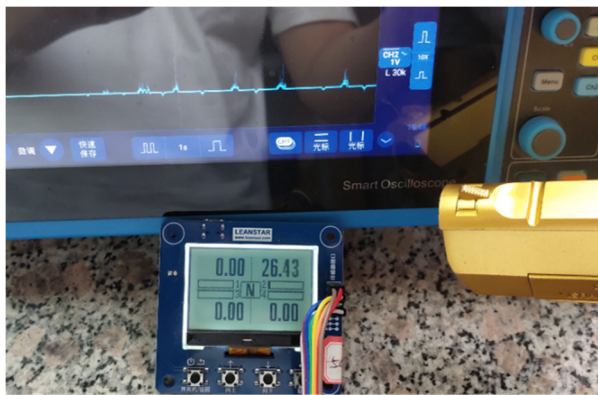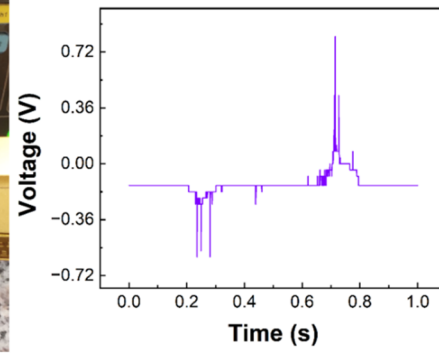

**Figure S4.** The relationship of voltage with trigger gravity.

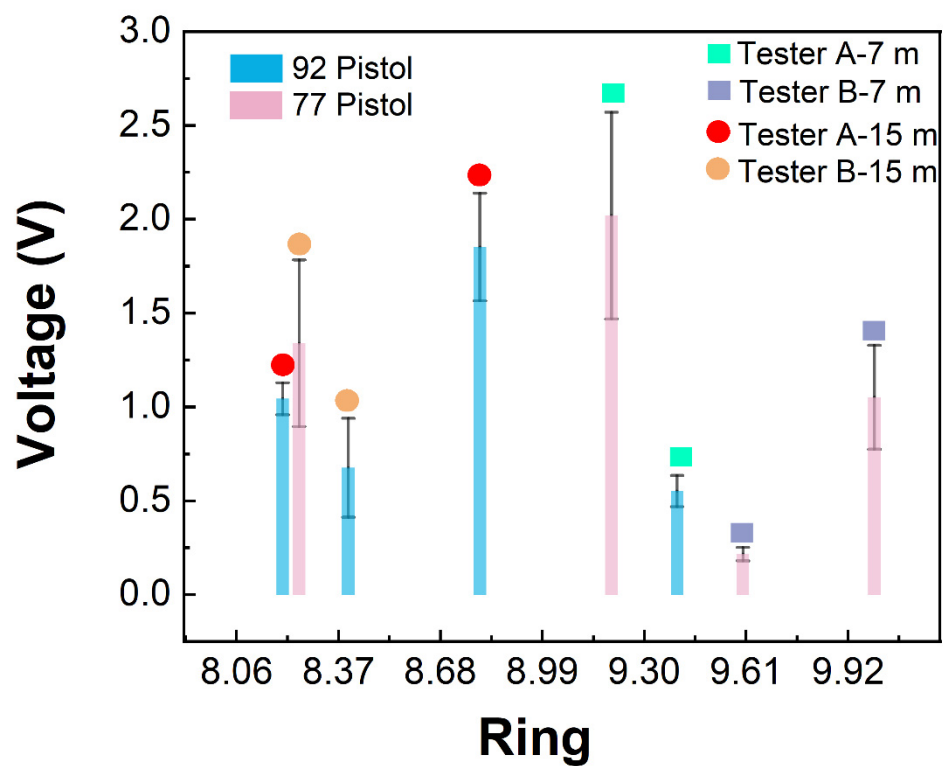

**Figure S5.** Relationship between voltage and rings of different people shooting with different guns at different distances.

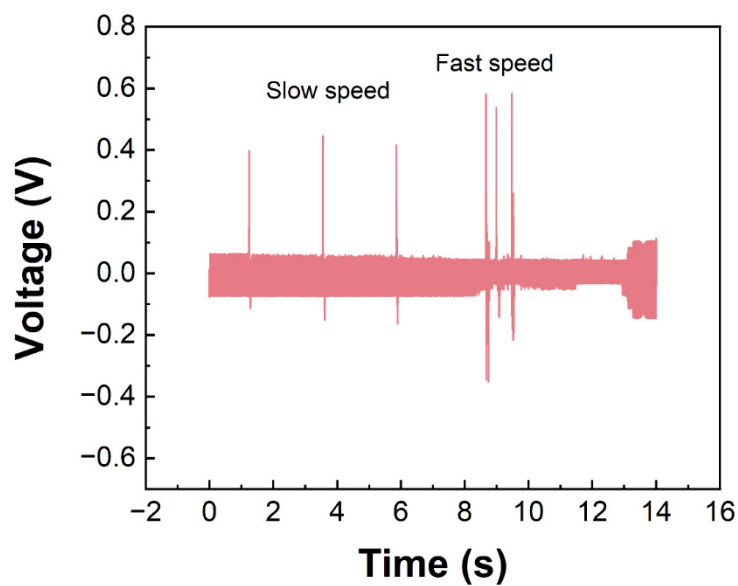

**Figure S6.** The voltage of different trigger frequency.

**Movie S1:** SPTENG Lights LED.

**Movie S2:** The signal transmission.

**Movie S3:** Multi-point control.

**Movie S4:** The Man-machine interaction system.
