# Supplementary material for: A Self-Powered Triboelectric Nanogenerator Based on Intelligent Interactive System for Police Shooting Training Monitoring and Virtual Reality Interaction
Source: Materials (Basel). 2022 Sep 8;15(18):6228. doi: 10.3390/ma15186228 (PMC9500841; doi:10.3390/ma15186228)
Supplement: Supplementary file 1 [file materials-15-06228-s001.zip]

Archive with 5 entries (5 files):
- materials-1877842-supplementary.pdf
- Video S1.mp4
- Video S2.mp4
- Video S3.mp4
- Video S4.mp4
